# Supplementary material
Source: MDPI journal article supplement (https://www.mdpi.com/2039-4713/14/1/11)
Supplement: s1 [file s1]

## Article

# Exposure and Health Risks Posed by Potentially Toxic Elements in Soils of Metal Fabrication Workshops in Mbarara City, Uganda

Eunice Nuwamanya <sup>1</sup>, Denis Byamugisha <sup>1</sup>, Caroline K. Nakiguli <sup>1</sup>, Christopher Angiro <sup>2</sup>, Alice V. Khanakwa <sup>3</sup>, Timothy Omara <sup>4,\*</sup>, Simon Ocakacon <sup>5</sup>, Patrick Onen <sup>6</sup>, Daniel Omoding <sup>7</sup>, Boniface Opio <sup>8,9</sup>, Daniel Nimusiima <sup>1</sup> and Emmanuel Ntambi <sup>1,\*</sup>

<sup>1</sup> Department of Chemistry, Faculty of Science, Mbarara University of Science and Technology, Mbarara P.O. Box 1410, Uganda; enuwamanya15@gmail.com (E.N.); cnakiguli@must.ac.ug (C.K.N.); nimusiimadaniel2@gmail.com (D.N.)

<sup>2</sup> Centre for Water, Environment and Development, School of Water, Energy and Environment, Cranfield University, Cranfield MK43 0AL, UK; christopher.angiro.602@cranfield.ac.uk

<sup>3</sup> Department of Environmental Health and Disease Prevention, Faculty of Public Health, Lira University, Lira P.O. Box 1035, Uganda; vonikhanakwaalice@ph.lirauni.ac.ug

<sup>4</sup> Department of Chemistry, College of Natural Sciences, Makerere University, Kampala P.O. Box 7062, Uganda

<sup>5</sup> Department of Civil and Environmental Engineering, College of Engineering, Design, Art and Technology, Makerere University, Kampala P.O. Box 7062, Uganda; ocakaconsimon@gmail.com

<sup>6</sup> Department of Chemistry, University of Kerala, Thiruvananthapuram 695581, India; patrickonen1995@gmail.com

<sup>7</sup> Department of Chemistry, Faculty of Science, University of Lucknow, Lucknow 226007, India; omodanzo@gmail.com

<sup>8</sup> Department of Science and Vocational Education, Lira University, Lira P.O. Box 1035, Uganda; bfopio@lirauni.ac.ug

<sup>9</sup> Department of Chemistry, Faculty of Science and Technology, Andhra University, Visakhapatnam 530003, India

\* Correspondence: prof.timo2018@gmail.com (T.O.); emmantambi@must.ac.ug (E.N.)

## SUPPLEMENTARY MATERIALS

**Table S1:** Values of exposure factors used in health risk assessments due to PTEs in soils from MFWs in Mbarara City, Uganda

| Factor    | Description (units)                                              | Factor values                                                                                                                         |                     |
|-----------|------------------------------------------------------------------|---------------------------------------------------------------------------------------------------------------------------------------|---------------------|
|           |                                                                  | Children                                                                                                                              | Adults              |
| $C_{PTE}$ | Concentration of PTEs in the soils ( $\text{mg kg}^{-1}$ )       | This study                                                                                                                            | This study          |
| $IngR$    | Ingestion rate ( $\text{mg day}^{-1}$ )                          | 200                                                                                                                                   | 100                 |
| EXF       | Exposure frequency ( $\text{days year}^{-1}$ )                   | 350                                                                                                                                   | 350                 |
| EXD       | Exposure duration (years)                                        | 6                                                                                                                                     | 30                  |
| FI        | Fraction ingested from the contaminated source (unitless)        | 1.0                                                                                                                                   | 1.0                 |
| $InhR$    | Inhalation rate of soil as dust ( $\text{m}^3 \text{day}^{-1}$ ) | 200                                                                                                                                   | 100                 |
| CVF       | Conversion factor ( $\text{kg mg}^{-1}$ )                        | $1 \times 10^{-6}$                                                                                                                    | $1 \times 10^{-6}$  |
| $W_{ab}$  | Body weight (kg)                                                 | 15                                                                                                                                    | 60                  |
| $T_{aet}$ | Average time (days)                                              | Non-carcinogenic: $\text{EXD} \times 365 \text{ days year}^{-1}$ ; carcinogenic: $60 \text{ years} \times 365 \text{ days year}^{-1}$ |                     |
| $S_{AF}$  | Surface area of skin exposed to soil as dust ( $\text{cm}^2$ )   | 2800                                                                                                                                  | 5700                |
| PEF       | Particular emission rate ( $\text{m}^3 \text{kg}^{-1}$ )         | $1.316 \times 10^9$                                                                                                                   | $1.316 \times 10^9$ |
| AF        | Skin adherence factor ( $\text{mg cm}^{-2}$ )                    | 0.2                                                                                                                                   | 0.7                 |
| DAF       | Dermal absorption factor (unitless)                              | 0.001                                                                                                                                 | 0.001               |

Based on US EPA [36,37], Ferreira-Baptista and De Miguel [38], and Ajeh et al. [35].

**Table S2:** Classification values of pollution and risk indices used in the study of PTEs in soils from MFWs in Mbarara City, Uganda

| Pollution and risk indicators             | Classification values                               | Description                      |
|-------------------------------------------|-----------------------------------------------------|----------------------------------|
| Contamination factor (CFs) [41]           | $CF < 1$                                            | Low contamination                |
|                                           | $1 \leq CF < 3$                                     | Moderate contamination           |
|                                           | $3 \leq CF < 6$                                     | Considerable contamination       |
|                                           | $CF > 6$                                            | Very high contamination          |
| Geo-accumulation index ( $I_{geo}$ ) [42] | $I_{geo} < 0$ (class 0)                             | Practically uncontaminated       |
|                                           | $0 < I_{geo} < 1$ (class 1)                         | Low to median contamination      |
|                                           | $1 < I_{geo} < 2$ (class 2)                         | Median contamination             |
|                                           | $2 < I_{geo} < 3$ (class 3)                         | Median to strong contamination   |
|                                           | $3 < I_{geo} < 4$ (class 4)                         | Serious contamination            |
|                                           | $4 < I_{geo} < 5$ (class 5)                         | Serious to extreme contamination |
| Pollution load index (PLDI)               | $I_{geo} > 5$ (class 6)                             | Extreme contamination            |
|                                           | $PLDI < 1$                                          | Unpolluted                       |
| Ecological risk ( $E_R^i$ and PERI) [41]  | $PLDI > 1$                                          | Polluted                         |
|                                           | $E_R^i < 40$ ; $PERI > 95$                          | Low contamination                |
|                                           | $40 \leq E_R^i \leq 80$ ; $95 \leq PERI \leq 190$   | Moderate contamination           |
|                                           | $80 \leq E_R^i \leq 160$ ; $190 \leq PERI \leq 380$ | Considerable contamination       |
|                                           | $160 \leq E_R^i \leq 320$ ; $PERI \geq 380$         | High contamination               |
|                                           | $320 \leq E_R^i$                                    | Very high contamination          |
